# Supplementary material for: Highlights on mantle deformation beneath the Western Alps with seismic anisotropy using CIFALPS2 data
Source: Copernicus journal article supplement (doi:10.5194/egusphere-2024-468), 2024-02-22
Supplement: Supplementary file 1 [file egusphere-2024-468-supplement.pdf]

Supplementary Material

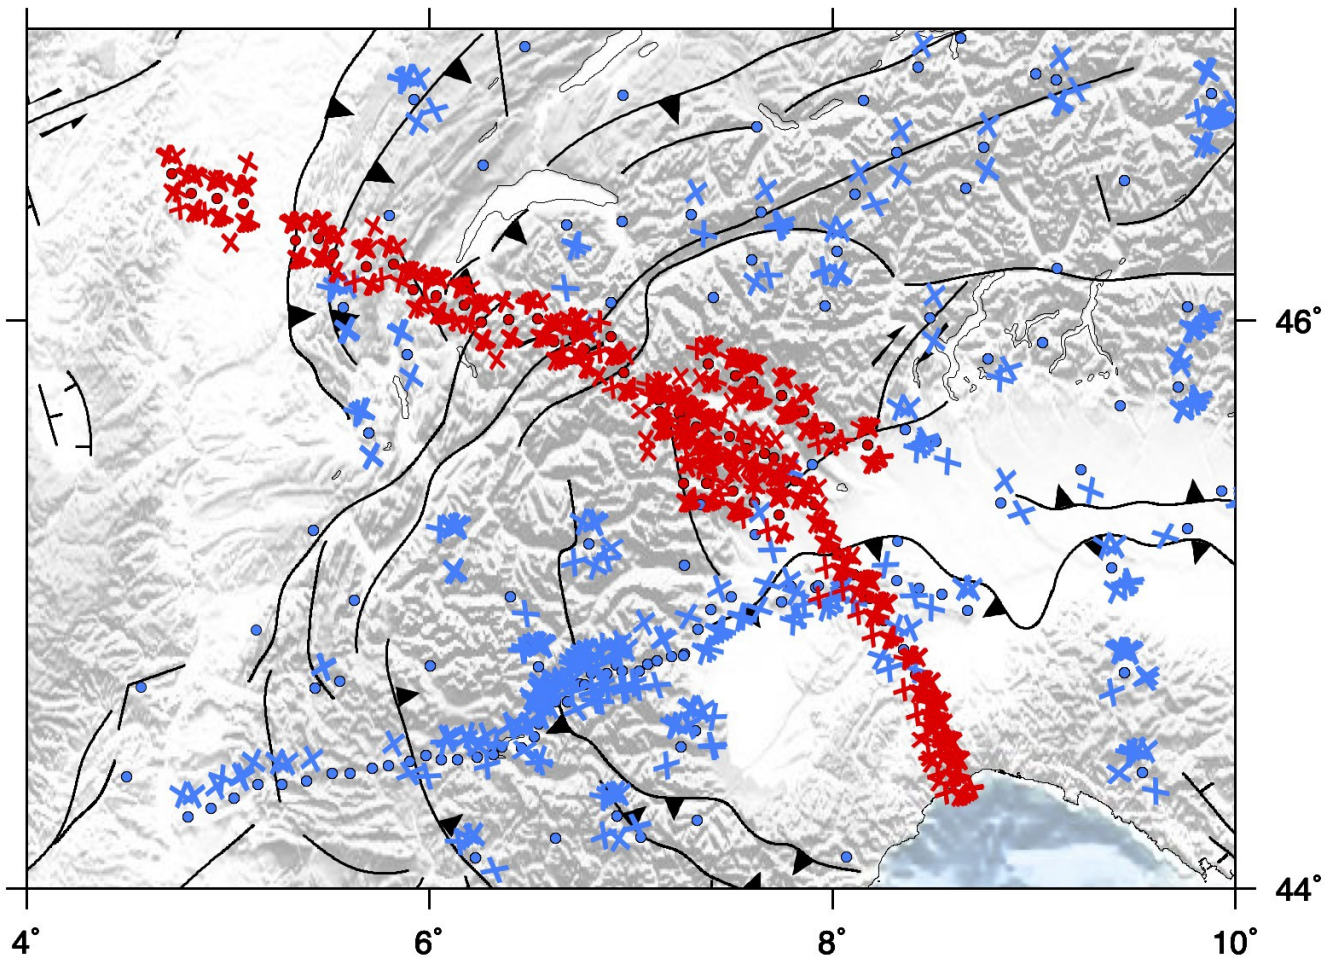

Figure S1 – Map of null measurements plotted at the piercing point of 150 km depth, marked with crosses, rotated in the back azimuth direction; in red from CIFALPS2 stations, in light blue all previous data.

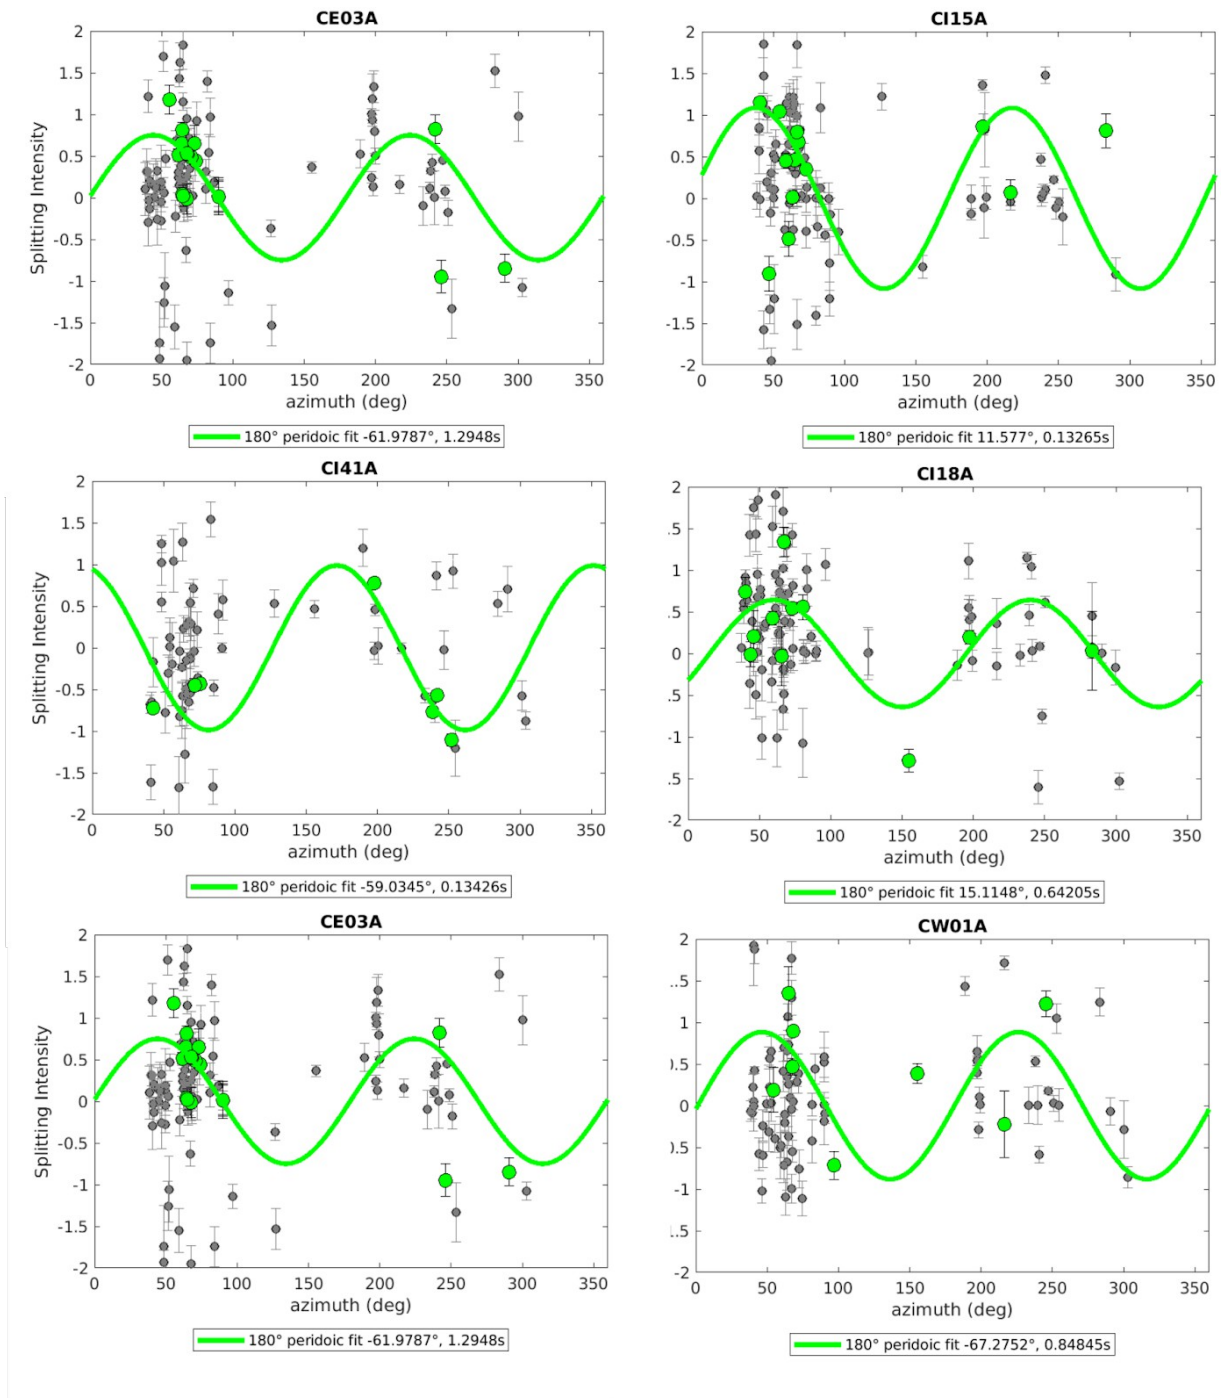

Figure S2 - Splitting intensity measurements for a few example stations. Grey dots: all measurements; green circles: only measurements that fit the criteria and the sinusoidal curve (fast polarisation direction and time delay written below).

Table S1 - Single Splitting Intensity (SI) measurements

| STA   | STA<br>LAT | STA<br>LON | EV<br>LAT | EV<br>LON | DEP   | BAZ  | INC  | SI      | SIerr  | EQ_ID<br>(yy,mm,dd,hh,<br>mm) |
|-------|------------|------------|-----------|-----------|-------|------|------|---------|--------|-------------------------------|
| CE01A | 45.850     | 7.3820     | -0.26     | 119.90    | 19.5  | 73.7 | 7.74 | 0.5633  | 0.0405 | 1809281002                    |
| CE01A | 45.850     | 7.3820     | 5.86      | 126.89    | 83.2  | 64.0 | 7.74 | 0.0601  | 0.0928 | 1812290339                    |
| CE01A | 45.850     | 7.3820     | 2.27      | 126.85    | 66.8  | 66.5 | 7.38 | 0.6501  | 0.0388 | 1901061727                    |
| CE01A | 45.850     | 7.3820     | -3.47     | 146.07    | 10.2  | 52.6 | 5.52 | 0.7454  | 0.2563 | 1901171506                    |
| CE01A | 45.850     | 7.3820     | -5.52     | 133.85    | 9.8   | 66.0 | 6.14 | -0.1614 | 0.1787 | 1901260812                    |
| CE01A | 45.850     | 7.3820     | -1.81     | 122.63    | 19.5  | 72.6 | 7.34 | 0.4412  | 0.0684 | 1904121140                    |
| CE01A | 45.850     | 7.3820     | 11.71     | 125.30    | 84.8  | 61.5 | 8.53 | 0.4253  | 0.0563 | 1904230537                    |
| CE01A | 45.850     | 7.3820     | -4.10     | 152.61    | 19.5  | 46.6 | 5.11 | 1.2355  | 0.0936 | 1905141258                    |
| CE01A | 45.850     | 7.3820     | 6.26      | 126.61    | 98.0  | 64.1 | 7.80 | 0.3064  | 0.1287 | 1905311012                    |
| CE01A | 45.850     | 7.3820     | 0.49      | 126.18    | 19.5  | 68.1 | 7.27 | 0.2399  | 0.2292 | 1907071508                    |
| CE01A | 45.850     | 7.3820     | -3.44     | 128.44    | 19.5  | 69.1 | 6.72 | 0.3207  | 0.1676 | 1909252346                    |
| CE01A | 45.850     | 7.3820     | 6.80      | 125.20    | 19.5  | 64.9 | 8.00 | 1.8302  | 0.1558 | 1910290104                    |
| CE01A | 45.850     | 7.3820     | 1.56      | 126.39    | 59.0  | 67.2 | 7.35 | 1.1091  | 0.0626 | 1911141617                    |
| CE02A | 45.809     | 7.5183     | -1.06     | 119.96    | 10.0  | 74.3 | 7.67 | 1.9190  | 0.2833 | 1809281025                    |
| CE02A | 45.809     | 7.5183     | -10.34    | 119.05    | 19.5  | 81.6 | 6.89 | -0.5372 | 0.2347 | 1901212359                    |
| CE02A | 45.809     | 7.5183     | -1.81     | 122.63    | 19.5  | 72.7 | 7.35 | 0.7407  | 0.3568 | 1904121140                    |
| CE02A | 45.809     | 7.5183     | -6.38     | 129.17    | 226.4 | 70.7 | 6.38 | 0.8537  | 0.0250 | 1906240253                    |
| CE02A | 45.809     | 7.5183     | -18.05    | 120.33    | 9.8   | 86.9 | 6.15 | 0.3457  | 0.3510 | 1907140539                    |
| CE02A | 45.809     | 7.5183     | -7.31     | 104.81    | 19.5  | 89.9 | 8.50 | 0.0089  | 0.1153 | 1908021203                    |
| CE02A | 45.809     | 7.5183     | 6.80      | 125.20    | 19.5  | 65.0 | 8.01 | 1.8607  | 0.1805 | 1910290104                    |
| CE03A | 45.786     | 7.6024     | -0.26     | 119.90    | 19.5  | 73.8 | 7.75 | 0.4436  | 0.0433 | 1809281002                    |
| CE03A | 45.786     | 7.6024     | 5.86      | 126.89    | 83.2  | 64.1 | 7.75 | 0.6473  | 0.0336 | 1812290339                    |
| CE03A | 45.786     | 7.6024     | -2.72     | 100.20    | 19.5  | 90.2 | 9.54 | 0.0166  | 0.1762 | 1902020927                    |
| CE03A | 45.786     | 7.6024     | -2.78     | 100.26    | 19.5  | 90.1 | 9.53 | 0.0174  | 0.2243 | 1902021059                    |
| CE03A | 45.786     | 7.6024     | -1.81     | 122.63    | 19.5  | 72.8 | 7.36 | 0.6455  | 0.2272 | 1904121140                    |
| CE03A | 45.786     | 7.6024     | 11.71     | 125.30    | 84.8  | 61.7 | 8.55 | 0.5141  | 0.0685 | 1904230537                    |
| CE03A | 45.786     | 7.6024     | -6.94     | 146.46    | 139.5 | 55.4 | 5.20 | 1.1786  | 0.1737 | 1905062119                    |
| CE03A | 45.786     | 7.6024     | 6.26      | 126.61    | 98.0  | 64.2 | 7.82 | 0.0370  | 0.0817 | 1905311012                    |

|       |        |        |        |        |       |       |      |         |        |            |
|-------|--------|--------|--------|--------|-------|-------|------|---------|--------|------------|
| CE03A | 45.786 | 7.6024 | -30.00 | -72.11 | 9.8   | 241.6 | 7.90 | 0.8227  | 0.1711 | 1906140019 |
| CE03A | 45.786 | 7.6024 | -6.38  | 129.17 | 226.4 | 70.8  | 6.39 | 0.4875  | 0.0605 | 1906240253 |
| CE03A | 45.786 | 7.6024 | 0.49   | 126.18 | 19.5  | 68.3  | 7.29 | 0.5261  | 0.0354 | 1907071508 |
| CE03A | 45.786 | 7.6024 | -0.92  | 128.60 | 9.8   | 67.4  | 6.95 | -0.0136 | 0.1784 | 1909141621 |
| CE03A | 45.786 | 7.6024 | 5.69   | 126.66 | 91.0  | 64.6  | 7.75 | 0.8130  | 0.0916 | 1909290202 |
| CE03A | 45.786 | 7.6024 | 6.80   | 125.15 | 19.5  | 65.1  | 8.02 | 0.0234  | 0.1278 | 1910161137 |
| CE03A | 45.786 | 7.6024 | 1.56   | 126.39 | 59.0  | 67.4  | 7.36 | 0.5351  | 0.0624 | 1911141617 |
| CE04A | 45.740 | 7.7453 | -0.26  | 119.90 | 19.5  | 74.0  | 7.76 | 0.9002  | 0.0797 | 1809281002 |
| CE04A | 45.740 | 7.7453 | 5.86   | 126.89 | 83.2  | 64.3  | 7.76 | 0.4851  | 0.0445 | 1812290339 |
| CE04A | 45.740 | 7.7453 | 2.27   | 126.85 | 66.8  | 66.8  | 7.41 | 1.2227  | 0.1311 | 1901061727 |
| CE04A | 45.740 | 7.7453 | 11.71  | 125.30 | 84.8  | 61.8  | 8.56 | 0.6598  | 0.0393 | 1904230537 |
| CE04A | 45.740 | 7.7453 | 6.26   | 126.61 | 98.0  | 64.4  | 7.83 | 0.6234  | 0.0394 | 1905311012 |
| CE04A | 45.740 | 7.7453 | -6.38  | 129.17 | 226.4 | 70.9  | 6.39 | 0.4874  | 0.0283 | 1906240253 |
| CE04A | 45.740 | 7.7453 | 0.49   | 126.18 | 19.5  | 68.5  | 7.30 | 0.8205  | 0.0843 | 1907071508 |
| CE04A | 45.740 | 7.7453 | 5.69   | 126.66 | 91.0  | 64.7  | 7.76 | 1.3103  | 0.1227 | 1909290202 |
| CE04A | 45.740 | 7.7453 | 6.80   | 125.20 | 19.5  | 65.2  | 8.03 | 0.7340  | 0.0793 | 1910290104 |
| CE04A | 45.740 | 7.7453 | 6.94   | 125.31 | 19.9  | 65.0  | 8.03 | -0.3912 | 0.2440 | 1910310111 |
| CE05A | 45.685 | 7.8551 | -57.49 | -66.29 | 33.6  | 216.7 | 5.99 | 0.3681  | 0.1224 | 1810292017 |
| CE05A | 45.685 | 7.8551 | 5.86   | 126.89 | 83.2  | 64.4  | 7.77 | 0.3449  | 0.0544 | 1812290339 |
| CE05A | 45.685 | 7.8551 | 9.78   | 126.60 | 19.5  | 62.1  | 8.24 | 0.4057  | 0.2107 | 1902081155 |
| CE05A | 45.685 | 7.8551 | 1.65   | 126.44 | 65.2  | 67.6  | 7.39 | 0.5038  | 0.3057 | 1903240437 |
| CE05A | 45.685 | 7.8551 | -1.81  | 122.63 | 19.5  | 73.0  | 7.38 | 1.0346  | 0.0606 | 1904121140 |
| CE05A | 45.685 | 7.8551 | 11.71  | 125.30 | 84.8  | 61.9  | 8.56 | 1.0035  | 0.0526 | 1904230537 |
| CE05A | 45.685 | 7.8551 | 6.26   | 126.61 | 98.0  | 64.5  | 7.84 | 0.7699  | 0.2665 | 1905311012 |
| CE05A | 45.685 | 7.8551 | -6.38  | 129.17 | 226.4 | 71.1  | 6.40 | 0.7452  | 0.0435 | 1906240253 |
| CE05A | 45.685 | 7.8551 | 0.49   | 126.18 | 19.5  | 68.6  | 7.30 | 1.3720  | 0.0813 | 1907071508 |
| CE05A | 45.685 | 7.8551 | 5.69   | 126.66 | 91.0  | 64.8  | 7.77 | 1.5481  | 0.1440 | 1909290202 |
| CE05A | 45.685 | 7.8551 | 6.94   | 125.31 | 19.9  | 65.1  | 8.04 | 1.4171  | 0.0876 | 1910310111 |
| CE05A | 45.685 | 7.8551 | 1.56   | 126.39 | 59.0  | 67.6  | 7.38 | 0.2845  | 0.1529 | 1911141617 |
| CE06A | 45.627 | 7.9818 | 5.86   | 126.89 | 83.2  | 64.5  | 7.78 | 0.5776  | 0.0807 | 1812290339 |
| CE06A | 45.627 | 7.9818 | -3.47  | 146.07 | 10.2  | 53.3  | 5.54 | 1.4210  | 0.2191 | 1901171506 |
| CE06A | 45.627 | 7.9818 | -14.62 | -70.10 | 258.6 | 251.3 | 9.71 | 1.2115  | 0.1033 | 1903010850 |

|       |        |        |        |        |       |       |      |         |        |            |
|-------|--------|--------|--------|--------|-------|-------|------|---------|--------|------------|
| CE06A | 45.627 | 7.9818 | -6.85  | 125.03 | 549.6 | 74.8  | 6.62 | -0.1637 | 0.0712 | 1904062155 |
| CE06A | 45.627 | 7.9818 | -1.81  | 122.63 | 19.5  | 73.2  | 7.39 | 0.6756  | 0.0601 | 1904121140 |
| CE06A | 45.627 | 7.9818 | 11.71  | 125.30 | 84.8  | 62.0  | 8.57 | 0.6584  | 0.0794 | 1904230537 |
| CE06A | 45.627 | 7.9818 | -6.38  | 129.17 | 226.4 | 71.2  | 6.41 | 1.2692  | 0.0288 | 1906240253 |
| CE06A | 45.627 | 7.9818 | 0.49   | 126.18 | 19.5  | 68.7  | 7.31 | 1.4828  | 0.0455 | 1907071508 |
| CE06A | 45.627 | 7.9818 | 1.56   | 126.39 | 59.0  | 67.7  | 7.39 | 1.2550  | 0.0529 | 1911141617 |
| CE07A | 45.567 | 8.1720 | -0.26  | 119.90 | 19.5  | 74.3  | 7.80 | 0.7674  | 0.1094 | 1809281002 |
| CE07A | 45.567 | 8.1720 | -58.42 | -26.33 | 164.8 | 198.1 | 7.42 | -0.2332 | 0.0613 | 1812110226 |
| CE07A | 45.567 | 8.1720 | 5.86   | 126.89 | 83.2  | 64.7  | 7.79 | 0.9517  | 0.0782 | 1812290339 |
| CE07A | 45.567 | 8.1720 | 11.71  | 125.30 | 84.8  | 62.2  | 8.58 | 0.3496  | 0.0663 | 1904230537 |
| CE07A | 45.567 | 8.1720 | 29.00  | 139.37 | 434.8 | 41.3  | 9.47 | -0.2703 | 0.1049 | 1906040439 |
| CE07A | 45.567 | 8.1720 | 0.49   | 126.18 | 19.5  | 68.9  | 7.33 | 0.7826  | 0.0851 | 1907071508 |
| CI01A | 46.504 | 4.7212 | 0.00   | 119.76 | 10.0  | 71.3  | 7.57 | -1.1948 | 0.1183 | 1809281014 |
| CI01A | 46.504 | 4.7212 | -42.87 | 42.28  | 19.5  | 153.3 | 9.28 | 0.6481  | 0.1108 | 1901221901 |
| CI01A | 46.504 | 4.7212 | -2.72  | 100.20 | 19.5  | 88.0  | 9.22 | 0.8975  | 0.1411 | 1902020927 |
| CI02A | 46.439 | 4.8174 | 0.00   | 119.76 | 10.0  | 71.4  | 7.58 | -1.3547 | 0.0757 | 1809281014 |
| CI02A | 46.439 | 4.8174 | 17.29  | 147.87 | 10.2  | 37.1  | 7.42 | 1.2665  | 0.4633 | 1810260905 |
| CI02A | 46.439 | 4.8174 | -7.43  | 128.75 | 159.0 | 69.2  | 6.16 | -0.0045 | 0.0479 | 1812011327 |
| CI02A | 46.439 | 4.8174 | -6.04  | 149.90 | 19.5  | 47.8  | 4.99 | 0.4637  | 0.1208 | 1812192137 |
| CI02A | 46.439 | 4.8174 | -42.87 | 42.28  | 19.5  | 153.3 | 9.29 | 1.1079  | 0.0936 | 1901221901 |
| CI03A | 46.421 | 4.9455 | -0.26  | 119.90 | 19.5  | 71.6  | 7.54 | 0.2770  | 0.0378 | 1809281002 |
| CI03A | 46.421 | 4.9455 | 0.00   | 119.76 | 10.0  | 71.5  | 7.59 | -1.5665 | 0.2224 | 1809281014 |
| CI03A | 46.421 | 4.9455 | -1.06  | 119.96 | 10.0  | 72.1  | 7.47 | -1.3681 | 0.1830 | 1809281025 |
| CI04A | 46.402 | 5.0743 | -42.87 | 42.28  | 19.5  | 153.5 | 9.31 | -0.5223 | 0.1560 | 1901221901 |
| CI05A | 46.277 | 5.3345 | -1.06  | 119.96 | 10.0  | 72.4  | 7.49 | 1.2095  | 0.1553 | 1809281025 |
| CI05A | 46.277 | 5.3345 | 1.65   | 126.44 | 65.2  | 65.4  | 7.21 | 0.0324  | 0.1228 | 1903240437 |
| CI05A | 46.277 | 5.3345 | -60.03 | -26.63 | 124.2 | 196.2 | 7.22 | 0.2716  | 0.0822 | 1908272355 |
| CI05A | 46.277 | 5.3345 | 6.87   | 125.24 | 34.8  | 63.1  | 7.86 | -0.0161 | 0.1148 | 1910290242 |
| CI05A | 46.277 | 5.3345 | 1.64   | 132.86 | 9.8   | 60.0  | 6.74 | 0.2371  | 0.1292 | 1911231211 |
| CI06A | 46.282 | 5.4496 | -10.34 | 119.05 | 19.5  | 79.8  | 6.72 | 0.3987  | 0.0763 | 1901212359 |
| CI06A | 46.282 | 5.4496 | 29.00  | 139.37 | 434.8 | 39.2  | 9.36 | 0.3377  | 0.0487 | 1906040439 |
| CI06A | 46.282 | 5.4496 | -31.80 | -71.45 | 55.9  | 238.7 | 7.92 | 0.0303  | 0.1514 | 1911042153 |

|       |        |        |        |        |       |       |      |         |        |            |
|-------|--------|--------|--------|--------|-------|-------|------|---------|--------|------------|
| CI07A | 46.231 | 5.5241 | -10.46 | 120.17 | 10.0  | 79.2  | 6.62 | -0.4238 | 0.1723 | 1810020016 |
| CI07A | 46.231 | 5.5241 | -30.11 | -71.58 | 61.3  | 240.0 | 8.07 | 0.0305  | 0.3285 | 1901200132 |
| CI07A | 46.231 | 5.5241 | -10.34 | 119.05 | 19.5  | 79.9  | 6.73 | 0.0121  | 0.1786 | 1901212359 |
| CI07A | 46.231 | 5.5241 | -10.37 | 119.05 | 19.5  | 80.0  | 6.73 | 0.0144  | 0.1773 | 1901220510 |
| CI07A | 46.231 | 5.5241 | -42.87 | 42.28  | 19.5  | 153.8 | 9.36 | -0.0046 | 0.0551 | 1901221901 |
| CI07A | 46.231 | 5.5241 | -5.52  | 133.85 | 9.8   | 64.2  | 6.03 | 0.0272  | 0.3418 | 1901260812 |
| CI07A | 46.231 | 5.5241 | -2.72  | 100.20 | 19.5  | 88.6  | 9.30 | 0.0113  | 0.1311 | 1902020927 |
| CI07A | 46.231 | 5.5241 | -2.78  | 100.26 | 19.5  | 88.6  | 9.29 | 0.0097  | 0.1310 | 1902021059 |
| CI07A | 46.231 | 5.5241 | 9.78   | 126.60 | 19.5  | 60.1  | 8.08 | 0.0419  | 0.4250 | 1902081155 |
| CI07A | 46.231 | 5.5241 | -6.85  | 125.03 | 549.6 | 72.6  | 6.46 | 0.1952  | 0.0530 | 1904062155 |
| CI07A | 46.231 | 5.5241 | -31.80 | -71.45 | 55.9  | 238.7 | 7.91 | 1.8757  | 0.4471 | 1911042153 |
| CI08A | 46.185 | 5.6842 | 17.29  | 147.87 | 10.2  | 37.9  | 7.44 | 0.4694  | 0.0833 | 1810260905 |
| CI08A | 46.185 | 5.6842 | -10.37 | 119.05 | 19.5  | 80.2  | 6.74 | -0.6585 | 0.0788 | 1901220510 |
| CI08A | 46.185 | 5.6842 | -7.00  | 156.40 | 384.4 | 42.1  | 4.58 | 0.8294  | 0.3038 | 1901260351 |
| CI08A | 46.185 | 5.6842 | 5.69   | 126.66 | 91.0  | 62.9  | 7.62 | 1.2057  | 0.3176 | 1909290202 |
| CI09A | 46.193 | 5.8187 | 12.22  | 146.24 | 10.0  | 42.1  | 6.97 | -0.4719 | 0.1859 | 1809230552 |
| CI09A | 46.193 | 5.8187 | -7.43  | 128.75 | 159.0 | 70.2  | 6.22 | -0.6023 | 0.1002 | 1812011327 |
| CI09A | 46.193 | 5.8187 | -10.37 | 119.05 | 19.5  | 80.3  | 6.75 | -0.8538 | 0.0843 | 1901220510 |
| CI09A | 46.193 | 5.8187 | 8.52   | 127.04 | 15.6  | 60.9  | 7.92 | 0.6865  | 0.1300 | 1903060013 |
| CI09A | 46.193 | 5.8187 | -55.76 | -27.85 | 74.2  | 198.9 | 7.71 | -0.0111 | 0.1160 | 1904051614 |
| CI10A | 46.105 | 5.9172 | -0.26  | 119.90 | 19.5  | 72.4  | 7.62 | 0.1711  | 0.0390 | 1809281002 |
| CI10A | 46.105 | 5.9172 | -58.42 | -26.33 | 164.8 | 197.1 | 7.42 | 1.3135  | 0.0682 | 1812110226 |
| CI10A | 46.105 | 5.9172 | -30.11 | -71.58 | 61.3  | 240.2 | 8.05 | 0.0236  | 0.2471 | 1901200132 |
| CI11A | 46.087 | 6.0314 | -58.42 | -26.33 | 164.8 | 197.1 | 7.42 | 1.0427  | 0.0921 | 1812110226 |
| CI11A | 46.087 | 6.0314 | -10.34 | 119.05 | 19.5  | 80.3  | 6.76 | 0.0942  | 0.0732 | 1901212359 |
| CI11A | 46.087 | 6.0314 | -2.78  | 100.26 | 19.5  | 89.0  | 9.35 | -0.8960 | 0.1927 | 1902021059 |
| CI11A | 46.087 | 6.0314 | 29.00  | 139.37 | 434.8 | 39.7  | 9.38 | 0.6820  | 0.2361 | 1906040439 |
| CI11A | 46.087 | 6.0314 | 0.49   | 126.18 | 19.5  | 67.0  | 7.17 | 0.6936  | 0.0319 | 1907071508 |
| CI12A | 46.053 | 6.1727 | -58.42 | -26.33 | 164.8 | 197.2 | 7.42 | 1.0550  | 0.1108 | 1812110226 |
| CI12A | 46.053 | 6.1727 | 5.86   | 126.89 | 83.2  | 62.9  | 7.65 | 0.0273  | 0.0413 | 1812290339 |
| CI12A | 46.053 | 6.1727 | -7.00  | 156.40 | 384.4 | 42.8  | 4.59 | 0.9258  | 0.1733 | 1901260351 |
| CI12A | 46.053 | 6.1727 | 29.00  | 139.37 | 434.8 | 39.8  | 9.38 | 0.6696  | 0.0703 | 1906040439 |

|       |        |        |        |        |       |       |      |         |        |            |
|-------|--------|--------|--------|--------|-------|-------|------|---------|--------|------------|
| CI12A | 46.053 | 6.1727 | -6.38  | 129.17 | 226.4 | 69.5  | 6.29 | 0.5003  | 0.0529 | 1906240253 |
| CI12A | 46.053 | 6.1727 | 0.49   | 126.18 | 19.5  | 67.1  | 7.18 | 0.7010  | 0.0255 | 1907071508 |
| CI12A | 46.053 | 6.1727 | 6.80   | 125.20 | 19.5  | 63.9  | 7.91 | 0.4365  | 0.0629 | 1910290104 |
| CI12A | 46.053 | 6.1727 | 6.94   | 125.31 | 19.9  | 63.7  | 7.92 | 0.9995  | 0.1303 | 1910310111 |
| CI13A | 45.994 | 6.2554 | 0.00   | 119.76 | 10.0  | 72.6  | 7.69 | 1.8037  | 0.1709 | 1809281014 |
| CI13A | 45.994 | 6.2554 | -4.94  | 151.71 | 139.8 | 46.8  | 5.02 | -0.3421 | 0.2386 | 1810102200 |
| CI13A | 45.994 | 6.2554 | 5.86   | 126.89 | 83.2  | 63.0  | 7.66 | 0.0133  | 0.0877 | 1812290339 |
| CI13A | 45.994 | 6.2554 | -7.00  | 156.40 | 384.4 | 42.9  | 4.59 | 0.7991  | 0.0959 | 1901260351 |
| CI13A | 45.994 | 6.2554 | 29.00  | 139.37 | 434.8 | 39.9  | 9.38 | 1.0184  | 0.0821 | 1906040439 |
| CI14A | 46.004 | 6.3926 | -1.06  | 119.96 | 10.0  | 73.3  | 7.57 | 1.7214  | 0.4915 | 1809281025 |
| CI14A | 46.004 | 6.3926 | 2.27   | 126.85 | 66.8  | 65.6  | 7.31 | 1.0425  | 0.1084 | 1901061727 |
| CI14A | 46.004 | 6.3926 | -42.87 | 42.28  | 19.5  | 154.4 | 9.44 | -0.7778 | 0.0786 | 1901221901 |
| CI14A | 46.004 | 6.3926 | -55.76 | -27.85 | 74.2  | 199.1 | 7.72 | -0.0462 | 0.2071 | 1904051614 |
| CI15A | 46.005 | 6.5370 | -0.26  | 119.90 | 19.5  | 73.0  | 7.67 | 0.3478  | 0.0340 | 1809281002 |
| CI15A | 46.005 | 6.5370 | -4.94  | 151.71 | 139.8 | 47.2  | 5.03 | -0.9066 | 0.2099 | 1810102200 |
| CI15A | 46.005 | 6.5370 | -57.30 | -66.37 | 63.3  | 216.4 | 6.03 | 0.0711  | 0.1547 | 1810290654 |
| CI15A | 46.005 | 6.5370 | 5.86   | 126.89 | 83.2  | 63.2  | 7.68 | 0.0152  | 0.0767 | 1812290339 |
| CI15A | 46.005 | 6.5370 | -5.52  | 133.85 | 9.8   | 65.2  | 6.08 | 0.4599  | 0.1246 | 1901260812 |
| CI15A | 46.005 | 6.5370 | 9.78   | 126.60 | 19.5  | 61.0  | 8.15 | -0.4844 | 0.2110 | 1902081155 |
| CI15A | 46.005 | 6.5370 | -6.94  | 146.46 | 139.5 | 54.2  | 5.15 | 1.0375  | 0.0683 | 1905062119 |
| CI15A | 46.005 | 6.5370 | -2.16  | 138.50 | 19.5  | 58.7  | 6.06 | 0.4506  | 0.0900 | 1906191724 |
| CI15A | 46.005 | 6.5370 | 19.79  | 144.47 | 409.8 | 40.6  | 7.87 | 1.1455  | 0.0290 | 1906281551 |
| CI15A | 46.005 | 6.5370 | 0.49   | 126.18 | 19.5  | 67.4  | 7.21 | 0.6778  | 0.0558 | 1907071508 |
| CI15A | 46.005 | 6.5370 | -60.03 | -26.63 | 124.2 | 196.7 | 7.23 | 0.8547  | 0.0277 | 1908272355 |
| CI15A | 46.005 | 6.5370 | 1.56   | 126.39 | 59.0  | 66.5  | 7.29 | 0.7970  | 0.0410 | 1911141617 |
| CI16A | 45.925 | 6.6170 | -0.26  | 119.90 | 19.5  | 73.0  | 7.67 | 0.6229  | 0.0386 | 1809281002 |
| CI16A | 45.925 | 6.6170 | -1.06  | 119.96 | 10.0  | 73.5  | 7.59 | -0.4874 | 0.1644 | 1809281025 |
| CI16A | 45.925 | 6.6170 | -35.87 | 101.03 | 18    | 253.1 | 5.33 | -0.0334 | 0.2491 | 1812190137 |
| CI16A | 45.925 | 6.6170 | -      | -      | -     | -     | -    | -       | -      | -          |
| CI16A | 45.925 | 6.6170 | -42.87 | 42.28  | 19.5  | 154.6 | 9.46 | -0.0054 | 0.0569 | 1901221901 |
| CI16A | 45.925 | 6.6170 | -5.52  | 133.85 | 9.8   | 65.3  | 6.09 | 0.0277  | 0.3249 | 1901260812 |
| CI16A | 45.925 | 6.6170 | -2.72  | 100.20 | 19.5  | 89.5  | 9.43 | 0.0097  | 0.1283 | 1902020927 |
| CI16A | 45.925 | 6.6170 | -2.78  | 100.26 | 19.5  | 89.4  | 9.42 | 0.0110  | 0.1277 | 1902021059 |

|       |        |        |        |        |       |       |      |         |        |            |
|-------|--------|--------|--------|--------|-------|-------|------|---------|--------|------------|
| CI16A | 45.925 | 6.6170 | 9.78   | 126.60 | 19.5  | 61.1  | 8.15 | 0.0456  | 0.4047 | 1902081155 |
| CI16A | 45.925 | 6.6170 | 10.35  | 126.12 | 62.1  | 61.2  | 8.24 | 1.5484  | 0.1891 | 1903081506 |
| CI16A | 45.925 | 6.6170 | 11.71  | 125.30 | 84.8  | 60.9  | 8.47 | 1.0051  | 0.0516 | 1904230537 |
| CI16A | 45.925 | 6.6170 | -6.94  | 146.46 | 139.5 | 54.3  | 5.15 | 0.9850  | 0.0723 | 1905062119 |
| CI16A | 45.925 | 6.6170 | -4.10  | 152.61 | 19.5  | 45.7  | 5.08 | 0.8694  | 0.1868 | 1905141258 |
| CI16A | 45.925 | 6.6170 | 29.00  | 139.37 | 434.8 | 40.1  | 9.40 | 0.9680  | 0.0709 | 1906040439 |
| CI16A | 45.925 | 6.6170 | -2.16  | 138.50 | 19.5  | 58.8  | 6.06 | 1.3793  | 0.1107 | 1906191724 |
| CI16A | 45.925 | 6.6170 | -6.38  | 129.17 | 226.4 | 69.9  | 6.32 | 0.5927  | 0.0624 | 1906240253 |
| CI16A | 45.925 | 6.6170 | 19.79  | 144.47 | 409.8 | 40.7  | 7.87 | 1.3315  | 0.0520 | 1906281551 |
| CI16A | 45.925 | 6.6170 | 0.49   | 126.18 | 19.5  | 67.5  | 7.21 | 0.8738  | 0.0392 | 1907071508 |
| CI16A | 45.925 | 6.6170 | -0.64  | 128.02 | 9.8   | 66.7  | 6.95 | 1.3038  | 0.1065 | 1907140910 |
| CI16A | 45.925 | 6.6170 | -60.03 | -26.63 | 124.2 | 196.8 | 7.23 | 1.3241  | 0.0545 | 1908272355 |
| CI17A | 45.947 | 6.7180 | -0.26  | 119.90 | 19.5  | 73.1  | 7.69 | 0.4495  | 0.0705 | 1809281002 |
| CI17A | 45.947 | 6.7180 | -10.46 | 120.17 | 10.0  | 80.3  | 6.72 | 1.4507  | 0.2269 | 1810020016 |
| CI17A | 45.947 | 6.7180 | -7.45  | 114.43 | 19.5  | 82.3  | 7.48 | -0.0878 | 0.1087 | 1810101844 |
| CI17A | 45.947 | 6.7180 | 5.86   | 126.89 | 83.2  | 63.4  | 7.69 | 0.0272  | 0.1362 | 1812290339 |
| CI17A | 45.947 | 6.7180 | -30.11 | -71.58 | 61.3  | 240.7 | 7.99 | 0.3770  | 0.1061 | 1901200132 |
| CI17A | 45.947 | 6.7180 | -42.87 | 42.28  | 19.5  | 154.6 | 9.46 | -0.9240 | 0.1025 | 1901221901 |
| CI17A | 45.947 | 6.7180 | 10.35  | 126.12 | 62.1  | 61.3  | 8.25 | 0.6499  | 0.0917 | 1903081506 |
| CI17A | 45.947 | 6.7180 | 29.00  | 139.37 | 434.8 | 40.2  | 9.41 | 0.7326  | 0.0746 | 1906040439 |
| CI17A | 45.947 | 6.7180 | 19.79  | 144.47 | 409.8 | 40.8  | 7.88 | 0.8229  | 0.0342 | 1906281551 |
| CI17A | 45.947 | 6.7180 | 0.49   | 126.18 | 19.5  | 67.6  | 7.22 | 0.6969  | 0.0281 | 1907071508 |
| CI17A | 45.947 | 6.7180 | 6.80   | 125.15 | 19.5  | 64.4  | 7.95 | 0.3724  | 0.0796 | 1910161137 |
| CI18A | 45.900 | 6.7699 | -0.26  | 119.90 | 19.5  | 73.2  | 7.69 | 0.5447  | 0.0679 | 1809281002 |
| CI18A | 45.900 | 6.7699 | -10.51 | 120.24 | 19.5  | 80.3  | 6.71 | 0.5548  | 0.1480 | 1810012359 |
| CI18A | 45.900 | 6.7699 | -58.42 | -26.33 | 164.8 | 197.5 | 7.42 | 0.1933  | 0.0836 | 1812110226 |
| CI18A | 45.900 | 6.7699 | -42.87 | 42.28  | 19.5  | 154.7 | 9.47 | -1.2876 | 0.1389 | 1901221901 |
| CI18A | 45.900 | 6.7699 | -7.00  | 156.40 | 384.4 | 43.6  | 4.61 | -0.0103 | 0.1471 | 1901260351 |
| CI18A | 45.900 | 6.7699 | -5.52  | 133.85 | 9.8   | 65.5  | 6.10 | -0.0302 | 0.3543 | 1901260812 |
| CI18A | 45.900 | 6.7699 | -3.35  | 152.23 | 358.6 | 46.0  | 5.13 | 0.2036  | 0.3078 | 1902171435 |
| CI18A | 45.900 | 6.7699 | -2.16  | 138.50 | 19.5  | 59.0  | 6.07 | 0.4230  | 0.0856 | 1906191724 |
| CI18A | 45.900 | 6.7699 | -0.64  | 128.02 | 9.8   | 66.9  | 6.97 | 1.3366  | 0.1783 | 1907140910 |



|       |        |        |        |        |       |       |      |         |        |            |
|-------|--------|--------|--------|--------|-------|-------|------|---------|--------|------------|
| CI19A | 45.945 | 6.8987 | -6.04  | 149.90 | 19.5  | 50.3  | 5.07 | -0.8620 | 0.1875 | 1812192137 |
| CI19A | 45.945 | 6.8987 | -14.62 | -70.10 | 258.6 | 250.6 | 9.81 | 0.5240  | 0.0502 | 1903010850 |
| CI19A | 45.945 | 6.8987 | -55.76 | -27.85 | 74.2  | 199.4 | 7.71 | 1.1017  | 0.0813 | 1904051614 |
| CI19A | 45.945 | 6.8987 | -6.85  | 125.03 | 549.6 | 73.8  | 6.55 | 1.8740  | 0.1424 | 1904062155 |
| CI19A | 45.945 | 6.8987 | -1.81  | 122.63 | 19.5  | 72.2  | 7.31 | 0.7696  | 0.0560 | 1904121140 |
| CI19A | 45.945 | 6.8987 | 29.00  | 139.37 | 434.8 | 40.3  | 9.42 | 1.2433  | 0.1255 | 1906040439 |
| CI19A | 45.945 | 6.8987 | -2.16  | 138.50 | 19.5  | 59.0  | 6.08 | 1.3913  | 0.0837 | 1906191724 |
| CI19A | 45.945 | 6.8987 | 0.49   | 126.18 | 19.5  | 67.7  | 7.24 | 0.9356  | 0.0420 | 1907071508 |
| CI19A | 45.945 | 6.8987 | -60.03 | -26.63 | 124.2 | 196.9 | 7.22 | 0.7249  | 0.0415 | 1908272355 |
| CI19A | 45.945 | 6.8987 | -35.41 | -73.17 | 13.1  | 237.9 | 7.35 | 0.7925  | 0.0687 | 1909291557 |
| CI19A | 45.945 | 6.8987 | 1.56   | 126.39 | 59.0  | 66.8  | 7.32 | 1.5790  | 0.0520 | 1911141617 |
| CI21A | 45.724 | 7.1389 | -0.26  | 119.90 | 19.5  | 73.5  | 7.71 | 1.0832  | 0.0989 | 1809281002 |
| CI21A | 45.724 | 7.1389 | 0.00   | 119.76 | 10.0  | 73.4  | 7.75 | 1.5397  | 0.0906 | 1809281014 |
| CI21A | 45.724 | 7.1389 | 5.86   | 126.89 | 83.2  | 63.8  | 7.72 | 0.8406  | 0.0842 | 1812290339 |
| CI21A | 45.724 | 7.1389 | -10.34 | 119.05 | 19.5  | 81.3  | 6.85 | 0.1473  | 0.2306 | 1901212359 |
| CI21A | 45.724 | 7.1389 | -10.37 | 119.05 | 19.5  | 81.5  | 6.85 | 0.2566  | 0.1864 | 1901220510 |
| CI21A | 45.724 | 7.1389 | -7.00  | 156.40 | 384.4 | 44.1  | 4.62 | 0.9413  | 0.2628 | 1901260351 |
| CI21A | 45.724 | 7.1389 | -6.38  | 129.17 | 226.4 | 70.4  | 6.35 | 0.9671  | 0.0372 | 1906240253 |
| CI21A | 45.724 | 7.1389 | 0.49   | 126.18 | 19.5  | 68.0  | 7.25 | 1.1114  | 0.0520 | 1907071508 |
| CI21A | 45.724 | 7.1389 | -18.05 | 120.33 | 9.8   | 86.7  | 6.12 | 1.1557  | 0.1200 | 1907140539 |
| CI21A | 45.724 | 7.1389 | -0.92  | 128.60 | 9.8   | 67.1  | 6.92 | -0.0895 | 0.1605 | 1909141621 |
| CI22A | 45.684 | 7.1415 | -0.26  | 119.90 | 19.5  | 73.5  | 7.71 | 0.7957  | 0.0723 | 1809281002 |
| CI22A | 45.684 | 7.1415 | 0.00   | 119.76 | 10.0  | 73.4  | 7.75 | 1.9444  | 0.1960 | 1809281014 |
| CI22A | 45.684 | 7.1415 | 0.49   | 126.18 | 19.5  | 68.0  | 7.24 | 0.9683  | 0.0948 | 1907071508 |
| CI22A | 45.684 | 7.1415 | -18.05 | 120.33 | 9.8   | 86.7  | 6.12 | 0.9249  | 0.1636 | 1907140539 |
| CI23A | 45.678 | 7.2388 | -0.26  | 119.90 | 19.5  | 73.6  | 7.72 | 1.0696  | 0.0717 | 1809281002 |
| CI23A | 45.678 | 7.2388 | -10.46 | 120.17 | 10.0  | 80.8  | 6.75 | -0.3726 | 0.1663 | 1810020016 |
| CI23A | 45.678 | 7.2388 | -23.04 | 112.66 | 10.2  | 96.6  | 6.36 | -0.0229 | 0.2452 | 1812161426 |
| CI23A | 45.678 | 7.2388 | 5.86   | 126.89 | 83.2  | 63.9  | 7.72 | 0.3909  | 0.0632 | 1812290339 |
| CI23A | 45.678 | 7.2388 | 2.27   | 126.85 | 66.8  | 66.4  | 7.36 | 0.4645  | 0.0964 | 1901061727 |
| CI23A | 45.678 | 7.2388 | 8.52   | 127.04 | 15.6  | 62.2  | 8.01 | 0.4764  | 0.0846 | 1903060013 |
| CI23A | 45.678 | 7.2388 | -55.76 | -27.85 | 74.2  | 199.6 | 7.73 | 0.0351  | 0.1391 | 1904051614 |

|       |        |        |        |        |       |      |      |         |        |            |
|-------|--------|--------|--------|--------|-------|------|------|---------|--------|------------|
| CI23A | 45.678 | 7.2388 | 11.71  | 125.30 | 84.8  | 61.5 | 8.51 | 0.8582  | 0.0591 | 1904230537 |
| CI23A | 45.678 | 7.2388 | -6.91  | 160.18 | 19.5  | 39.6 | 4.49 | 1.3872  | 0.1619 | 1905030725 |
| CI23A | 45.678 | 7.2388 | 6.26   | 126.61 | 98.0  | 64.0 | 7.78 | 0.5985  | 0.0725 | 1905311012 |
| CI23A | 45.678 | 7.2388 | -6.38  | 129.17 | 226.4 | 70.5 | 6.36 | 0.9549  | 0.0367 | 1906240253 |
| CI23A | 45.678 | 7.2388 | 0.49   | 126.18 | 19.5  | 68.1 | 7.25 | 0.8975  | 0.0462 | 1907071508 |
| CI23A | 45.678 | 7.2388 | 6.80   | 125.20 | 19.5  | 64.8 | 7.98 | 0.7865  | 0.0844 | 1910290104 |
| CI23A | 45.678 | 7.2388 | 1.56   | 126.39 | 59.0  | 67.1 | 7.33 | 1.1949  | 0.1322 | 1911141617 |
| CI24A | 45.650 | 7.2530 | -0.26  | 119.90 | 19.5  | 73.6 | 7.72 | 1.0694  | 0.0929 | 1809281002 |
| CI24A | 45.650 | 7.2530 | 5.86   | 126.89 | 83.2  | 63.9 | 7.72 | 0.3099  | 0.0539 | 1812290339 |
| CI24A | 45.650 | 7.2530 | -6.85  | 125.03 | 549.6 | 74.2 | 6.57 | 0.1893  | 0.0861 | 1904062155 |
| CI24A | 45.650 | 7.2530 | 11.71  | 125.30 | 84.8  | 61.5 | 8.50 | 0.8582  | 0.0459 | 1904230537 |
| CI24A | 45.650 | 7.2530 | -6.94  | 146.46 | 139.5 | 55.1 | 5.17 | 0.0734  | 0.2975 | 1905062119 |
| CI24A | 45.650 | 7.2530 | -6.38  | 129.17 | 226.4 | 70.6 | 6.36 | 1.0258  | 0.0482 | 1906240253 |
| CI24A | 45.650 | 7.2530 | 0.49   | 126.18 | 19.5  | 68.1 | 7.25 | 0.9026  | 0.0457 | 1907071508 |
| CI24A | 45.650 | 7.2530 | -4.44  | 101.28 | 19.5  | 90.3 | 9.18 | 1.0278  | 0.0605 | 1910142223 |
| CI24A | 45.650 | 7.2530 | 6.80   | 125.20 | 19.5  | 64.9 | 7.98 | 0.9197  | 0.0646 | 1910290104 |
| CI24A | 45.650 | 7.2530 | 1.64   | 132.86 | 9.8   | 61.8 | 6.84 | 0.5526  | 0.0733 | 1911231211 |
| CI25A | 45.629 | 7.3243 | -0.26  | 119.90 | 19.5  | 73.7 | 7.73 | 0.9740  | 0.0663 | 1809281002 |
| CI25A | 45.629 | 7.3243 | -1.06  | 119.96 | 10.0  | 74.2 | 7.64 | 0.6391  | 0.1449 | 1809281025 |
| CI25A | 45.629 | 7.3243 | 5.86   | 126.89 | 83.2  | 64.0 | 7.72 | 0.4368  | 0.0366 | 1812290339 |
| CI25A | 45.629 | 7.3243 | -10.37 | 119.05 | 19.5  | 81.7 | 6.86 | 0.9757  | 0.0780 | 1901220510 |
| CI25A | 45.629 | 7.3243 | 11.71  | 125.30 | 84.8  | 61.5 | 8.51 | 0.5712  | 0.0546 | 1904230537 |
| CI25A | 45.629 | 7.3243 | 6.26   | 126.61 | 98.0  | 64.1 | 7.78 | -1.7950 | 0.3814 | 1905311012 |
| CI25A | 45.629 | 7.3243 | -6.38  | 129.17 | 226.4 | 70.6 | 6.36 | 1.0434  | 0.0566 | 1906240253 |
| CI25A | 45.629 | 7.3243 | 0.49   | 126.18 | 19.5  | 68.2 | 7.26 | 0.9086  | 0.0999 | 1907071508 |
| CI25A | 45.629 | 7.3243 | 6.80   | 125.20 | 19.5  | 64.9 | 7.98 | 1.1708  | 0.1304 | 1910290104 |
| CI25A | 45.629 | 7.3243 | 1.56   | 126.39 | 59.0  | 67.2 | 7.34 | 0.2650  | 0.0838 | 1911141617 |
| CI26A | 45.596 | 7.3907 | -10.37 | 119.05 | 19.5  | 81.7 | 6.87 | 1.1453  | 0.2121 | 1901220510 |
| CI26A | 45.596 | 7.3907 | -10.09 | 152.09 | 10.2  | 51.7 | 4.62 | 0.7148  | 0.2772 | 1903101248 |
| CI26A | 45.596 | 7.3907 | 0.49   | 126.18 | 19.5  | 68.2 | 7.26 | 1.1745  | 0.0782 | 1907071508 |
| CI27A | 45.596 | 7.4880 | -10.46 | 120.17 | 10.0  | 81.0 | 6.77 | 0.3866  | 0.4755 | 1810020016 |
| CI28A | 45.556 | 7.5737 | 11.71  | 125.30 | 84.8  | 61.7 | 8.53 | 0.4497  | 0.1141 | 1904230537 |

|       |        |        |        |        |       |       |      |         |        |            |
|-------|--------|--------|--------|--------|-------|-------|------|---------|--------|------------|
| CI29A | 45.538 | 7.6631 | 6.26   | 126.61 | 98.0  | 64.4  | 7.81 | 0.4439  | 0.2432 | 1905311012 |
| CI29A | 45.538 | 7.6631 | -6.38  | 129.17 | 226.4 | 71.0  | 6.38 | 1.0928  | 0.1515 | 1906240253 |
| CI29A | 45.538 | 7.6631 | 0.49   | 126.18 | 19.5  | 68.5  | 7.28 | 0.7900  | 0.3852 | 1907071508 |
| CI29A | 45.538 | 7.6631 | 6.26   | 126.61 | 98.0  | 64.4  | 7.81 | 0.4439  | 0.2432 | 1905311012 |
| CI29A | 45.538 | 7.6631 | -6.38  | 129.17 | 226.4 | 71.0  | 6.38 | 1.0928  | 0.1515 | 1906240253 |
| CI29A | 45.538 | 7.6631 | 0.49   | 126.18 | 19.5  | 68.5  | 7.28 | 0.7900  | 0.3852 | 1907071508 |
| CI30A | 45.524 | 7.7104 | -6.04  | 149.90 | 19.5  | 51.5  | 5.08 | -1.1889 | 0.2453 | 1812192137 |
| CI30A | 45.524 | 7.7104 | 0.49   | 126.18 | 19.5  | 68.5  | 7.28 | 1.2315  | 0.1096 | 1907071508 |
| CI30A | 45.524 | 7.7104 | -0.92  | 128.60 | 9.8   | 67.6  | 6.95 | 0.4890  | 0.2897 | 1909141621 |
| CI31A | 45.441 | 7.8122 | -14.62 | -70.10 | 258.6 | 251.2 | 9.74 | 0.5816  | 0.0492 | 1903010850 |
| CI31A | 45.441 | 7.8122 | 29.00  | 139.37 | 434.8 | 41.0  | 9.43 | -0.6504 | 0.1497 | 1906040439 |
| CI31A | 45.441 | 7.8122 | 6.80   | 125.15 | 19.5  | 65.4  | 8.02 | 0.4940  | 0.0762 | 1910161137 |
| CI32A | 45.359 | 7.9062 | 6.26   | 126.61 | 98.0  | 64.6  | 7.82 | 0.7431  | 0.1956 | 1905311012 |
| CI32A | 45.359 | 7.9062 | 6.80   | 125.20 | 19.5  | 65.4  | 8.02 | 0.4591  | 0.1371 | 1910290104 |
| CI33A | 45.288 | 7.9447 | -23.04 | 112.66 | 10.2  | 97.3  | 6.42 | -0.9293 | 0.1217 | 1812161426 |
| CI33A | 45.288 | 7.9447 | -30.11 | -71.58 | 61.3  | 241.3 | 7.93 | 0.6535  | 0.1378 | 1901200132 |
| CI33A | 45.288 | 7.9447 | 9.78   | 126.60 | 19.5  | 62.2  | 8.22 | 0.2719  | 0.0948 | 1902081155 |
| CI33A | 45.288 | 7.9447 | 19.79  | 144.47 | 409.8 | 41.9  | 7.89 | -1.4684 | 0.0720 | 1906281551 |
| CI34A | 45.191 | 8.0221 | 29.00  | 139.37 | 434.8 | 41.2  | 9.42 | -0.8557 | 0.1315 | 1906040439 |
| CI36A | 45.031 | 8.1833 | -10.46 | 120.17 | 10.0  | 81.8  | 6.82 | -1.1712 | 0.2383 | 1810020016 |
| CI36A | 45.031 | 8.1833 | -10.37 | 119.05 | 19.5  | 82.6  | 6.93 | -0.7112 | 0.0744 | 1901220510 |
| CI36A | 45.031 | 8.1833 | -2.72  | 100.20 | 19.5  | 90.6  | 9.62 | -0.0929 | 0.2266 | 1902020927 |
| CI36A | 45.031 | 8.1833 | 11.71  | 125.30 | 84.8  | 62.3  | 8.55 | 0.3814  | 0.0714 | 1904230537 |
| CI36A | 45.031 | 8.1833 | 6.26   | 126.61 | 98.0  | 64.9  | 7.83 | 0.8216  | 0.1222 | 1905311012 |
| CI37A | 44.952 | 8.2530 | -23.04 | 112.66 | 10.2  | 97.6  | 6.45 | -1.4554 | 0.4135 | 1812161426 |
| CI37A | 44.952 | 8.2530 | 6.26   | 126.61 | 98.0  | 65.0  | 7.83 | 0.3742  | 0.1807 | 1905311012 |
| CI37A | 44.952 | 8.2530 | -5.97  | 149.59 | 77.3  | 52.8  | 5.10 | -0.9196 | 0.1089 | 1907150821 |
| CI37A | 44.952 | 8.2530 | -0.92  | 128.60 | 9.8   | 68.3  | 6.97 | 0.7664  | 0.2996 | 1909141621 |
| CI37A | 44.952 | 8.2530 | 6.80   | 125.15 | 19.5  | 65.8  | 8.03 | 0.0407  | 0.0936 | 1910161137 |
| CI38A | 44.762 | 8.4124 | -57.30 | -66.37 | 63.3  | 216.7 | 6.05 | 0.0020  | 0.0200 | 1810290654 |
| CI38A | 44.762 | 8.4124 | -57.49 | -66.29 | 33.6  | 216.6 | 6.04 | 0.0013  | 0.0212 | 1810292017 |
| CI38A | 44.762 | 8.4124 | -14.62 | -70.10 | 258.6 | 251.6 | 9.71 | -0.5057 | 0.0510 | 1903010850 |

|       |        |        |        |        |       |       |      |         |        |            |
|-------|--------|--------|--------|--------|-------|-------|------|---------|--------|------------|
| CI38A | 44.762 | 8.4124 | 11.71  | 125.30 | 84.8  | 62.5  | 8.55 | 0.0356  | 0.1141 | 1904230537 |
| CI38A | 44.762 | 8.4124 | 6.26   | 126.61 | 98.0  | 65.1  | 7.83 | -1.3133 | 0.1998 | 1905311012 |
| CI38A | 44.762 | 8.4124 | 19.79  | 144.47 | 409.8 | 42.4  | 7.87 | -0.0079 | 0.0850 | 1906281551 |
| CI38A | 44.762 | 8.4124 | 0.49   | 126.18 | 19.5  | 69.3  | 7.31 | -0.0235 | 0.2395 | 1907071508 |
| CI38A | 44.762 | 8.4124 | -0.64  | 128.02 | 9.8   | 68.6  | 7.05 | -0.0216 | 0.2307 | 1907140910 |
| CI38A | 44.762 | 8.4124 | -5.97  | 149.59 | 77.3  | 53.0  | 5.09 | -0.0113 | 0.1240 | 1907150821 |
| CI38A | 44.762 | 8.4124 | 6.80   | 125.20 | 19.5  | 66.0  | 8.03 | -0.0554 | 0.3688 | 1910290104 |
| CI38A | 44.762 | 8.4124 | 6.87   | 125.24 | 34.8  | 65.9  | 8.03 | -0.0287 | 0.3667 | 1910290242 |
| CI38A | 44.762 | 8.4124 | 6.94   | 125.31 | 19.9  | 65.7  | 8.03 | -0.0234 | 0.3639 | 1910310111 |
| CI38A | 44.762 | 8.4124 | -31.80 | -71.45 | 55.9  | 240.1 | 7.77 | -0.0203 | 0.2100 | 1911042153 |
| CI38A | 44.762 | 8.4124 | 1.64   | 132.86 | 9.8   | 63.1  | 6.88 | -0.0321 | 0.3138 | 1911231211 |
| CI38A | 44.762 | 8.4124 | -18.35 | -70.45 | 9.8   | 249.3 | 9.30 | -0.0295 | 0.3405 | 1912030846 |
| CI39A | 44.674 | 8.4731 | -57.30 | -66.37 | 63.3  | 216.7 | 6.05 | -1.1151 | 0.1490 | 1810290654 |
| CI39A | 44.674 | 8.4731 | -2.72  | 100.20 | 19.5  | 90.8  | 9.66 | 0.0927  | 0.2980 | 1902020927 |
| CI39A | 44.674 | 8.4731 | -60.03 | -26.63 | 124.2 | 197.5 | 7.34 | 0.9247  | 0.0259 | 1908272355 |
| CI39A | 44.674 | 8.4731 | 1.64   | 132.86 | 9.8   | 63.2  | 6.88 | -0.1997 | 0.1510 | 1911231211 |
| CI40A | 44.605 | 8.5230 | -2.72  | 100.20 | 19.5  | 90.9  | 9.66 | -1.9685 | 0.2516 | 1902020927 |
| CI40A | 44.605 | 8.5230 | -2.16  | 138.50 | 19.5  | 61.2  | 6.12 | -0.7546 | 0.0745 | 1906191724 |
| CI40A | 44.605 | 8.5230 | -18.05 | 120.33 | 9.8   | 88.3  | 6.22 | -0.7765 | 0.2318 | 1907140539 |
| CI40A | 44.605 | 8.5230 | -0.92  | 128.60 | 9.8   | 68.6  | 6.97 | 0.2667  | 0.2197 | 1909141621 |
| CI41A | 44.530 | 8.5343 | -14.62 | -70.10 | 258.6 | 251.7 | 9.71 | -1.1041 | 0.0740 | 1903010850 |
| CI41A | 44.530 | 8.5343 | -6.85  | 125.03 | 549.6 | 75.7  | 6.64 | -0.4293 | 0.0606 | 1904062155 |
| CI41A | 44.530 | 8.5343 | -30.00 | -72.11 | 9.8   | 241.9 | 7.90 | -0.5665 | 0.0411 | 1906140019 |
| CI41A | 44.530 | 8.5343 | -6.38  | 129.17 | 226.4 | 72.1  | 6.41 | -0.4470 | 0.0766 | 1906240253 |
| CI41A | 44.530 | 8.5343 | 19.79  | 144.47 | 409.8 | 42.6  | 7.85 | -0.7258 | 0.0398 | 1906281551 |
| CI41A | 44.530 | 8.5343 | -60.03 | -26.63 | 124.2 | 197.6 | 7.35 | 0.7816  | 0.0243 | 1908272355 |
| CI41A | 44.530 | 8.5343 | -35.41 | -73.17 | 13.1  | 238.4 | 7.33 | -0.7712 | 0.0424 | 1909291557 |
| CI42A | 44.462 | 8.5805 | -10.37 | 119.05 | 19.5  | 83.1  | 6.95 | 1.1350  | 0.2285 | 1901220510 |
| CI42A | 44.462 | 8.5805 | -42.87 | 42.28  | 19.5  | 155.9 | 9.78 | 0.8690  | 0.0501 | 1901221901 |
| CI42A | 44.462 | 8.5805 | -6.38  | 129.17 | 226.4 | 72.2  | 6.41 | -0.6015 | 0.0986 | 1906240253 |
| CI42A | 44.462 | 8.5805 | -35.41 | -73.17 | 13.1  | 238.4 | 7.33 | -1.2119 | 0.0655 | 1909291557 |
| CI43A | 44.397 | 8.6165 | -42.87 | 42.28  | 19.5  | 155.9 | 9.80 | 0.9450  | 0.0675 | 1901221901 |

|           |        |        |        |        |       |       |      |         |        |            |
|-----------|--------|--------|--------|--------|-------|-------|------|---------|--------|------------|
| CI43A     | 44.397 | 8.6165 | -3.35  | 152.23 | 358.6 | 48.8  | 5.12 | -0.6969 | 0.0964 | 1902171435 |
| CI43A     | 44.397 | 8.6165 | -14.62 | -70.10 | 258.6 | 251.7 | 9.70 | -0.6959 | 0.0911 | 1903010850 |
| CI43A     | 44.397 | 8.6165 | -6.38  | 129.17 | 226.4 | 72.3  | 6.41 | -0.3171 | 0.0641 | 1906240253 |
| CI43A     | 44.397 | 8.6165 | -34.17 | -72.38 | 19.7  | 238.9 | 7.50 | -0.8792 | 0.0723 | 1908011828 |
| CI43A     | 44.397 | 8.6165 | -35.41 | -73.17 | 13.1  | 238.4 | 7.33 | -1.0847 | 0.0803 | 1909291557 |
| CW01<br>A | 45.433 | 7.2591 | -57.49 | -66.29 | 33.6  | 216.4 | 6.04 | -0.2244 | 0.4004 | 1810292017 |
| CW01<br>A | 45.433 | 7.2591 | -23.04 | 112.66 | 10.2  | 96.7  | 6.37 | -0.7174 | 0.1679 | 1812161426 |
| CW01<br>A | 45.433 | 7.2591 | -42.87 | 42.28  | 19.5  | 155.0 | 9.57 | 0.3877  | 0.1196 | 1901221901 |
| CW01<br>A | 45.433 | 7.2591 | 0.49   | 126.18 | 19.5  | 68.2  | 7.24 | 0.8938  | 0.0544 | 1907071508 |
| CW02<br>A | 45.433 | 7.3747 | -57.30 | -66.37 | 63.3  | 216.5 | 6.04 | 1.7705  | 0.1204 | 1810290654 |
| CW02<br>A | 45.433 | 7.3747 | -57.49 | -66.29 | 33.6  | 216.4 | 6.03 | -0.2153 | 0.0996 | 1810292017 |
| CW02<br>A | 45.433 | 7.3747 | 0.49   | 126.18 | 19.5  | 68.3  | 7.25 | 1.0730  | 0.0886 | 1907071508 |
| CW02<br>A | 45.433 | 7.3747 | -0.92  | 128.60 | 9.8   | 67.4  | 6.93 | 0.0417  | 0.1917 | 1909141621 |
| CW03<br>A | 45.407 | 7.5053 | 2.27   | 126.85 | 66.8  | 66.7  | 7.37 | 1.7258  | 0.1987 | 1901061727 |
| CW03<br>A | 45.407 | 7.5053 | 11.71  | 125.30 | 84.8  | 61.7  | 8.51 | 0.5868  | 0.0836 | 1904230537 |
| CW03<br>A | 45.407 | 7.5053 | 0.49   | 126.18 | 19.5  | 68.4  | 7.26 | 0.8621  | 0.1016 | 1907071508 |
| CW03<br>A | 45.407 | 7.5053 | 6.80   | 125.20 | 19.5  | 65.1  | 7.99 | -0.5815 | 0.2034 | 1910290104 |
| CW04<br>A | 45.367 | 7.6128 | 8.52   | 127.04 | 15.6  | 62.5  | 8.02 | 0.4399  | 0.0883 | 1903060013 |
| CW04<br>A | 45.367 | 7.6128 | 0.49   | 126.18 | 19.5  | 68.5  | 7.27 | 1.0816  | 0.0850 | 1907071508 |
| CW05<br>A | 45.324 | 7.7318 | -5.52  | 133.85 | 9.8   | 66.6  | 6.14 | 0.8727  | 0.1121 | 1901260812 |
| CW05<br>A | 45.324 | 7.7318 | 6.80   | 125.20 | 19.5  | 65.3  | 8.00 | -0.7146 | 0.0854 | 1910290104 |
| CT03A     | 44.324 | 5.0275 | -46.33 | 35.07  | 33    | 159.7 | 9.43 | 1.0060  | 0.0652 | 1307220701 |
| CT04A     | 44.371 | 5.1477 | -46.33 | 35.07  | 33    | 159.7 | 9.42 | 1.4409  | 0.0996 | 1307220701 |
| CT05A     | 44.370 | 5.2677 | -46.33 | 35.07  | 33    | 159.8 | 9.43 | 1.4937  | 0.0686 | 1307220701 |
| CT06A     | 44.382 | 5.3872 | -3.23  | 100.59 | 23.5  | 88.7  | 9.18 | -0.8362 | 0.1189 | 1307060505 |
| CT08A     | 44.412 | 5.6051 | 18.79  | 145.27 | 598.0 | 39.9  | 7.44 | -0.6962 | 0.0466 | 1305140032 |
| CT09A     | 44.429 | 5.7144 | -46.33 | 35.07  | 33    | 160.1 | 9.44 | 1.6600  | 0.0938 | 1307220701 |

|       |        |        |        |        |      |       |      |         |        |            |
|-------|--------|--------|--------|--------|------|-------|------|---------|--------|------------|
| CT10A | 44.437 | 5.7940 | -46.33 | 35.07  | 33   | 160.2 | 9.44 | 1.9193  | 0.0602 | 1307220701 |
| CT11A | 44.454 | 5.9026 | -10.03 | 107.18 | 11.1 | 89.3  | 7.83 | -0.9164 | 0.0895 | 1306131647 |
| CT11A | 44.454 | 5.9026 | -5.43  | -81.99 | 5    | 264.6 | 9.80 | -1.6904 | 0.0501 | 1308120949 |
| CT12A | 44.475 | 5.9826 | -46.33 | 35.07  | 33   | 160.3 | 9.44 | 1.8337  | 0.0526 | 1307220701 |
| CT13A | 44.460 | 6.0559 | -46.33 | 35.07  | 33   | 160.3 | 9.45 | 1.9759  | 0.0929 | 1307220701 |
| CT20A | 44.585 | 6.5389 | -46.33 | 35.07  | 33   | 160.6 | 9.45 | 1.3514  | 0.0864 | 1307220701 |
| CT21A | 44.654 | 6.5686 | -3.23  | 100.59 | 23.5 | 89.5  | 9.31 | -0.3706 | 0.1366 | 1307060505 |
| CT21A | 44.654 | 6.5686 | -46.33 | 35.07  | 33   | 160.7 | 9.44 | 1.1207  | 0.0477 | 1307220701 |

Table S2 - Anisotropy parameters obtained from SI measurements

| STA   | ST LAT | ST LON | FPD   | Time Delay (s) | FPDerr | TDerr |
|-------|--------|--------|-------|----------------|--------|-------|
| CE03A | 45.786 | 7.6024 | -0.78 | 0.74992        | -11.2  | 0,639 |
| CI07A | 46.231 | 5.5241 | 11.58 | 0.13265        | 14.3   | 0,203 |
| CI11A | 46.087 | 6.0314 | -0.32 | 0.83092        | 12.8   | 1,75  |
| CI15A | 46.005 | 6.5370 | -7.45 | 1.08421        | -7.0   | 1,101 |
| CI16A | 45.925 | 6.6170 | -2.58 | 1.09206        | 2.1    | 1,304 |
| CI17A | 45.947 | 6.7180 | 11.48 | 0.79153        | 12.3   | 0,709 |
| CI18A | 45.900 | 6.7699 | 15.11 | 0.64205        | 21.3   | 1,154 |

|       |        |        |        |         |       |       |
|-------|--------|--------|--------|---------|-------|-------|
| CI19A | 45.945 | 6.8987 | 0.99   | 1.32372 | 4.1   | 1,079 |
| CI21A | 45.724 | 7.1389 | 37.08  | 1.03633 | 36.2  | 0,871 |
| CI23A | 45.678 | 7.2388 | 22.22  | 0.73735 | 22.8  | 1,026 |
| CI24A | 45.650 | 7.2530 | 37.75  | 0.92882 | 32.4  | 0,781 |
| CI38A | 44.762 | 8.4124 | -59.03 | 0.13426 | -45.1 | 0,187 |
| CI39A | 44.674 | 8.4731 | -43.54 | 1.00657 | 79.8  | 1,005 |
| CI41A | 44.530 | 8.5343 | -53.46 | 0.98773 | -66.8 | 0,707 |
| CI42A | 44.462 | 8.5805 | 76.64  | 2.17814 | 79.3  | 1,755 |
| CI43A | 44.397 | 8.6165 | -67.27 | 0.84845 | -63.6 | 0,865 |
| CW01A | 45.433 | 7.2591 | 1.35   | 0.88253 | -5.7  | 1,428 |
| CW02A | 45.433 | 7.3747 | 22.80  | 0.77871 | 35.3  | 1,92  |
